# Supplementary material for: Pharmacoinformatics and UPLC-QTOF/ESI-MS-Based Phytochemical Screening of Combretum indicum against Oxidative Stress and Alloxan-Induced Diabetes in Long–Evans Rats
Source: MDPI journal article supplement (doi:10.3390/molecules26154634), 2021-07-30
Supplement: s1 [file s1]

# Pharmacoinformatics and UPLC-QTOF/ESI-MS-Based Phytochemical Screening of *Combretum indicum* against Oxidative Stress and Alloxan-Induced Diabetes in Long-Evans Rats

Md. Shaekh Forid <sup>1</sup>, Md. Atiar Rahman <sup>2,\*</sup>, Mohd Fadhilzil Fasihi Mohd Aluwi <sup>3</sup>, Md. Nazim Uddin <sup>4</sup>,

Tapashi Ghosh Roy <sup>5</sup>, Milon Chandra Mohanta <sup>6</sup>, AKM Moyeenul Huq <sup>7,\*</sup> and Zainul Amiruddin Zakaria <sup>8,\*</sup>

<sup>1</sup> Department of Pharmacy, School of Science and Engineering, Southeast University, Dhaka 1213, Bangladesh; foridpharmacy91@gmail.com

<sup>2</sup> Department of Biochemistry & Molecular Biology, University of Chittagong, Chittagong 4331, Bangladesh

<sup>3</sup> Faculty of Industrial Science and Technology, Universiti Malaysia Pahang, Pahang 26300, Malaysia; fasihi@ump.edu.my

<sup>4</sup> Institute of Food Science and Technology, Bangladesh Council of Scientific and Industrial Research, Dhaka 1205, Bangladesh; nazimbio@yahoo.com

<sup>5</sup> Department of Chemistry, University of Chittagong, Chittagong-4331, Bangladesh; tapashir57@cu.ac.bd

<sup>6</sup> Department of Chemistry, School of Science and Engineering, Tulane University, New Orleans, LA 70118, USA; milonmohanta@yahoo.com

<sup>7</sup> Department of Pharmacy, School of Medicine, University of Asia Pacific, 74/A, Green Road, Dhaka-1205, Bangladesh

<sup>8</sup> Department of Biomedical Science, Faculty of Medicine and Health Sciences, Universiti Putra Malaysia, UPM Serdang 43400 Selangor, Malaysia

\* Correspondence: atiar@cu.ac.bd (M.A.R.); moyeenul.rph@uap-bd.edu (A.K.M.M.H.); zaz@upm.edu.my (Z.A.Z.); Tel.: +88-0312606001-14 (M.A.R.); +88-01906790224 (A.K.M.M.H.); +6019-2117090 (Z.A.Z.)

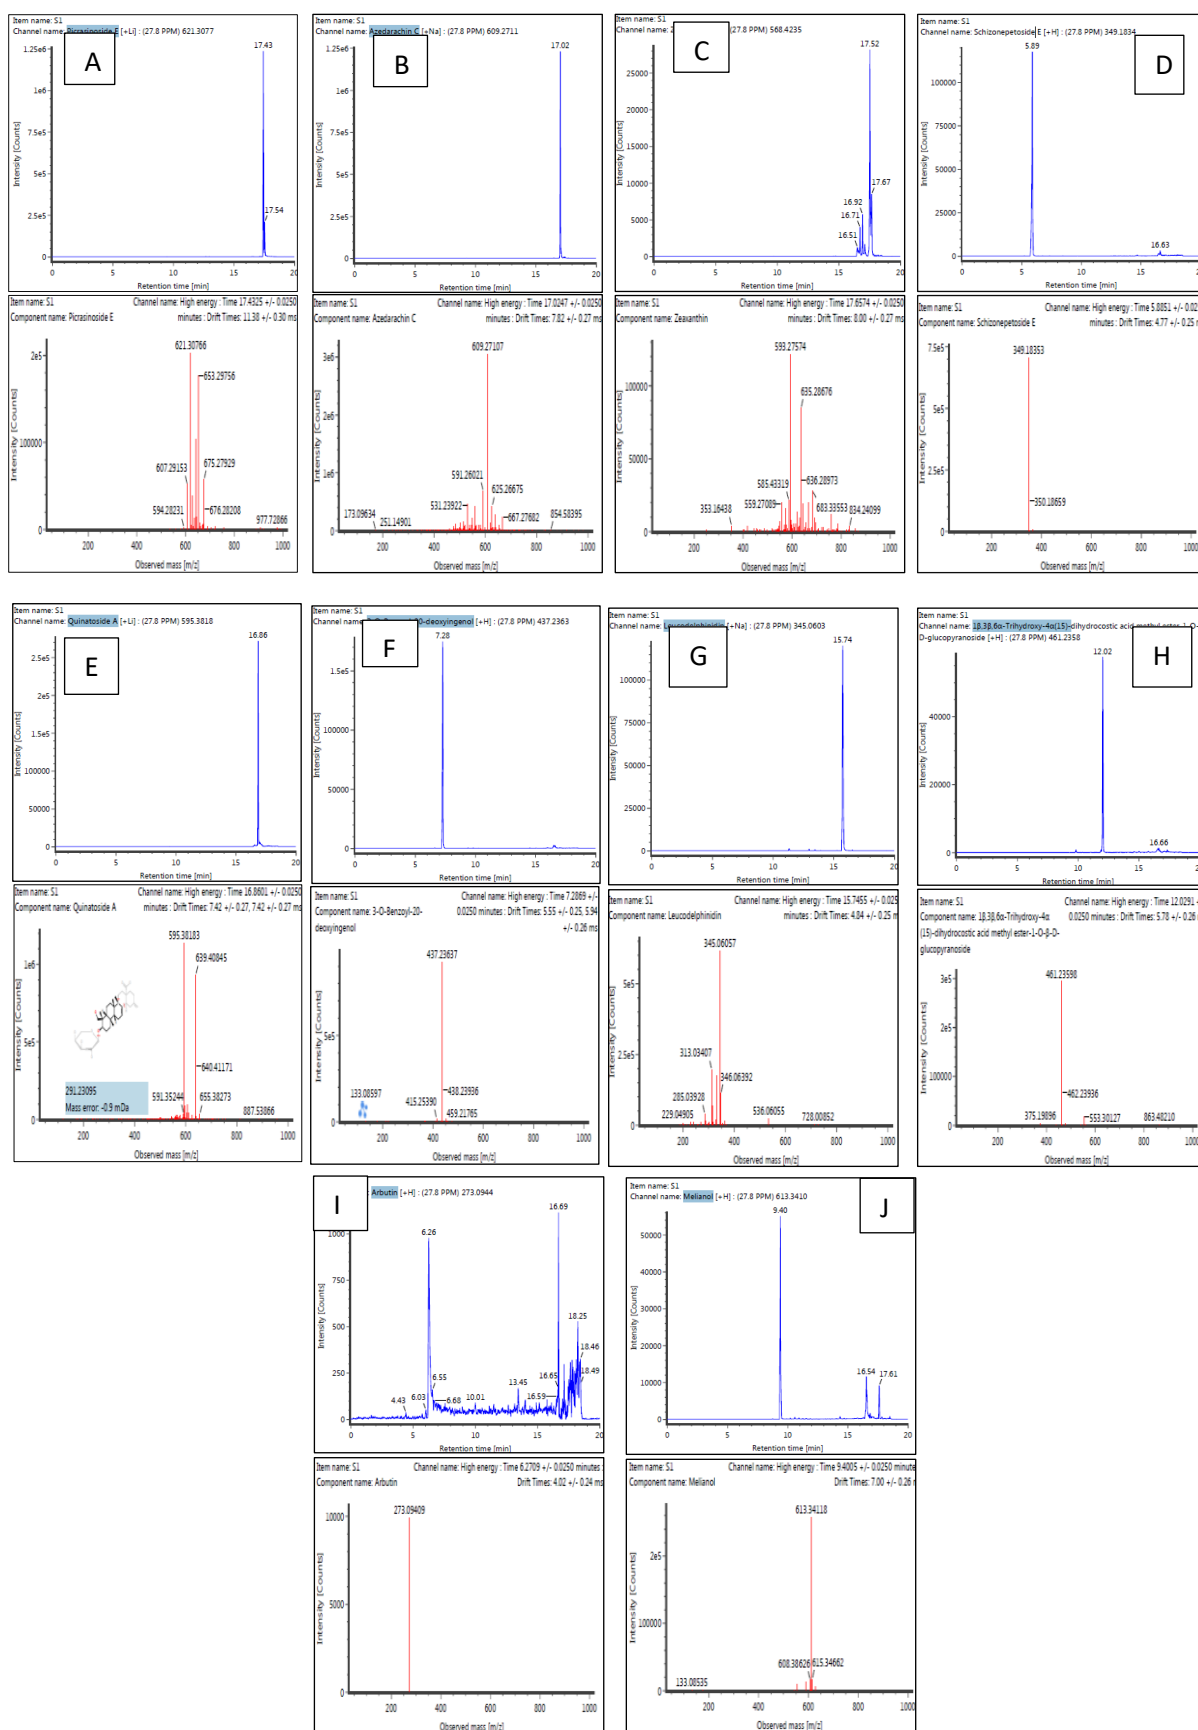

**Figure S1:** LC chromatogram and mass spectra of CILEx for high-intensity compounds identified and vertically arranged as (A) Picrasinoside E; (B) Azedarachin C; (C) Zeaxanthin; (D) Quinatoside A; (E) 3-O-Benzoyl-20-deoxyingenol; (F) Leucodelphinidin; (G) Schizonepetoside E; (H) 1β,3β,6α-Trihydroxy-4α(15)-dihydrocostic acid methyl ester-1-O-β-D-glucopyranoside; (I) Melianol; (J) Arbutin.

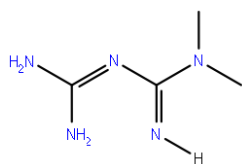

Metformin

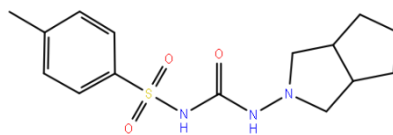

Gliclazide

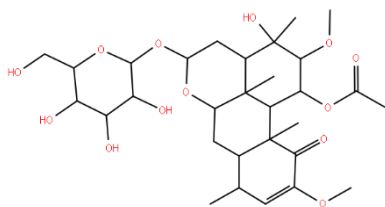

Picrasone\_E

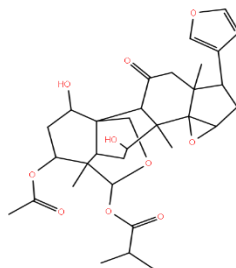

Azedarachin C

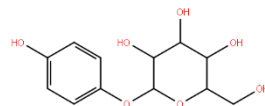

Arbutin

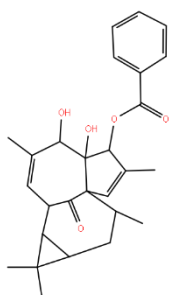

3-O-Benzoyl-2-O-deoxyingenol

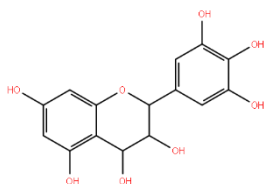

Leucodelphinidin

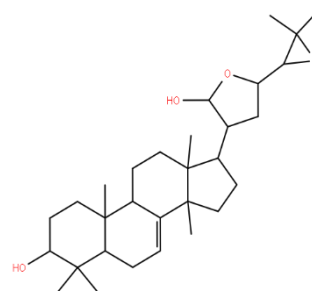

Melianol

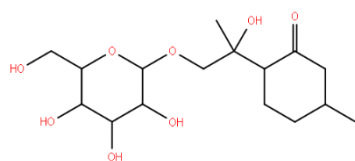

Schizonepetoside E

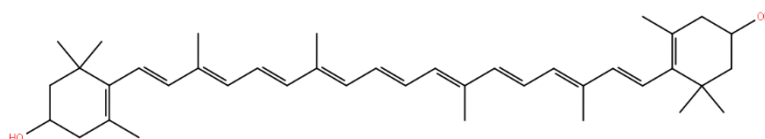

Zeaxanthin

Figure S2: list of chemical structures of the ligand molecules available in PubChem.

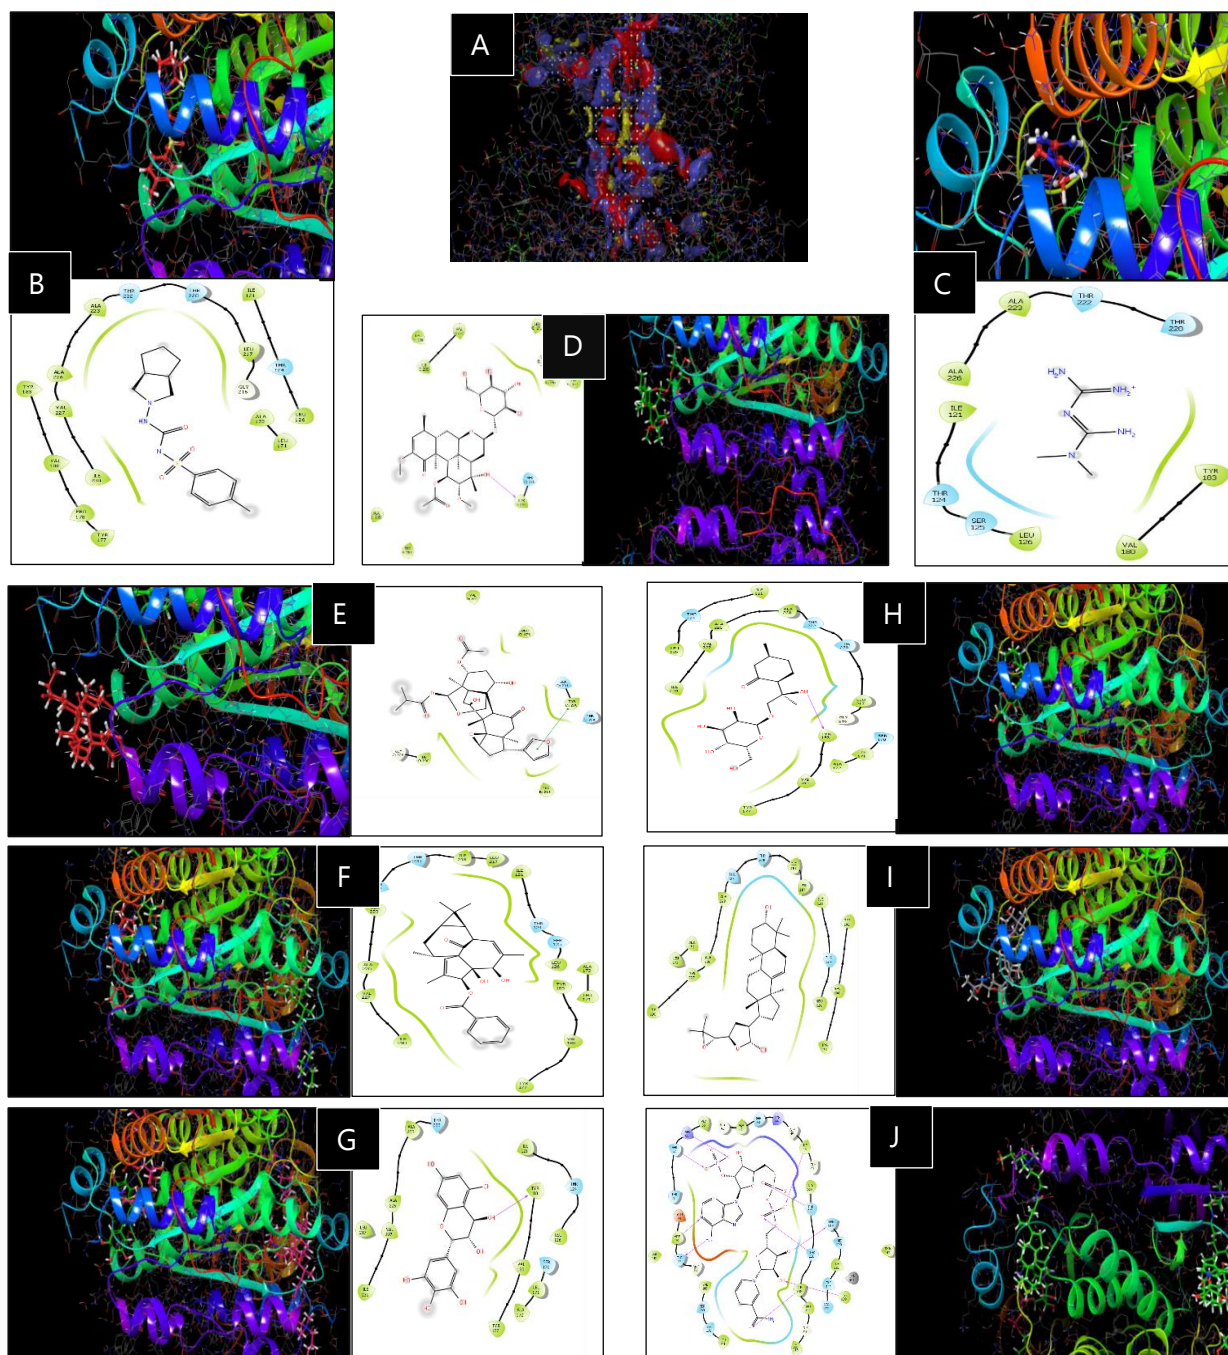

**Figure S3:** Interactions based on A. site map of seven ligands D. Picrasone E. Azedarachin C. 3-O-Benzoyl-20-deoxyingenol; G. Leucodelphinidin; H. Schizonepetoside E. I. Melianol; and J. Arbutin with the receptor IXU9. Schizonepetoside showed the highest docking score (-8.145) compared with the reference antidiabetic drugs B. Gliclazide and C. Metformin.



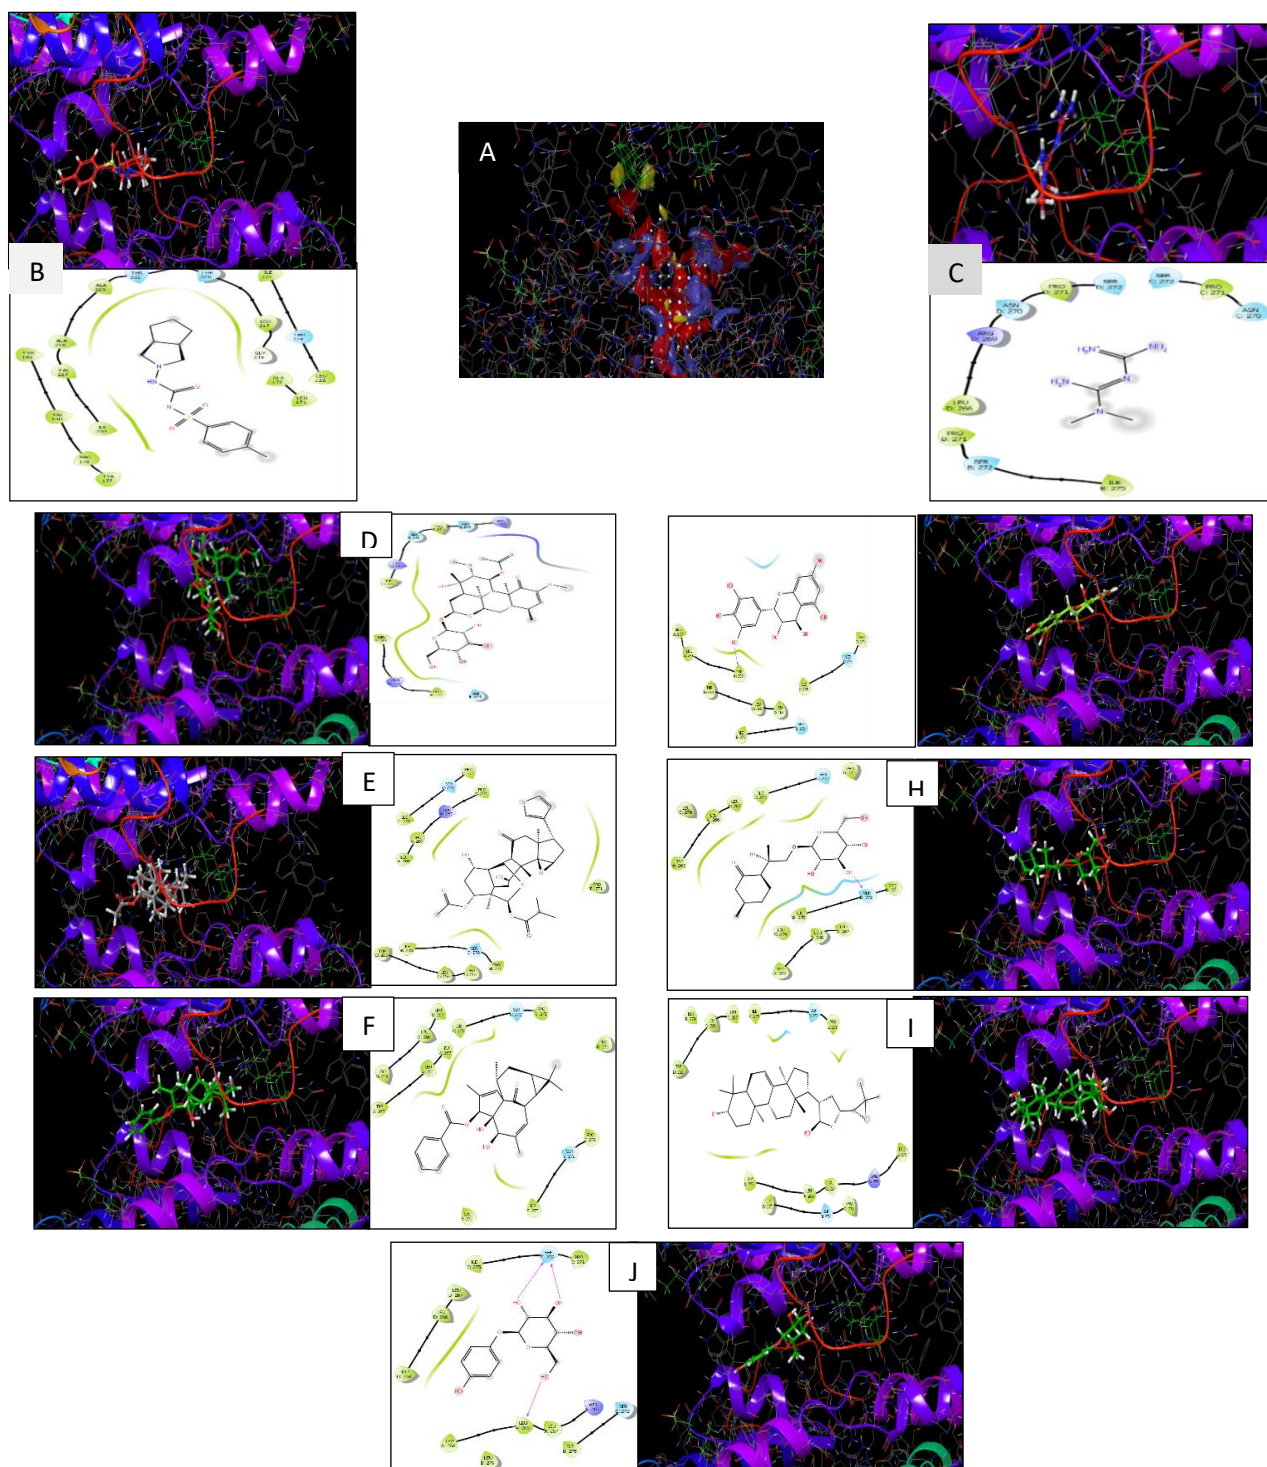

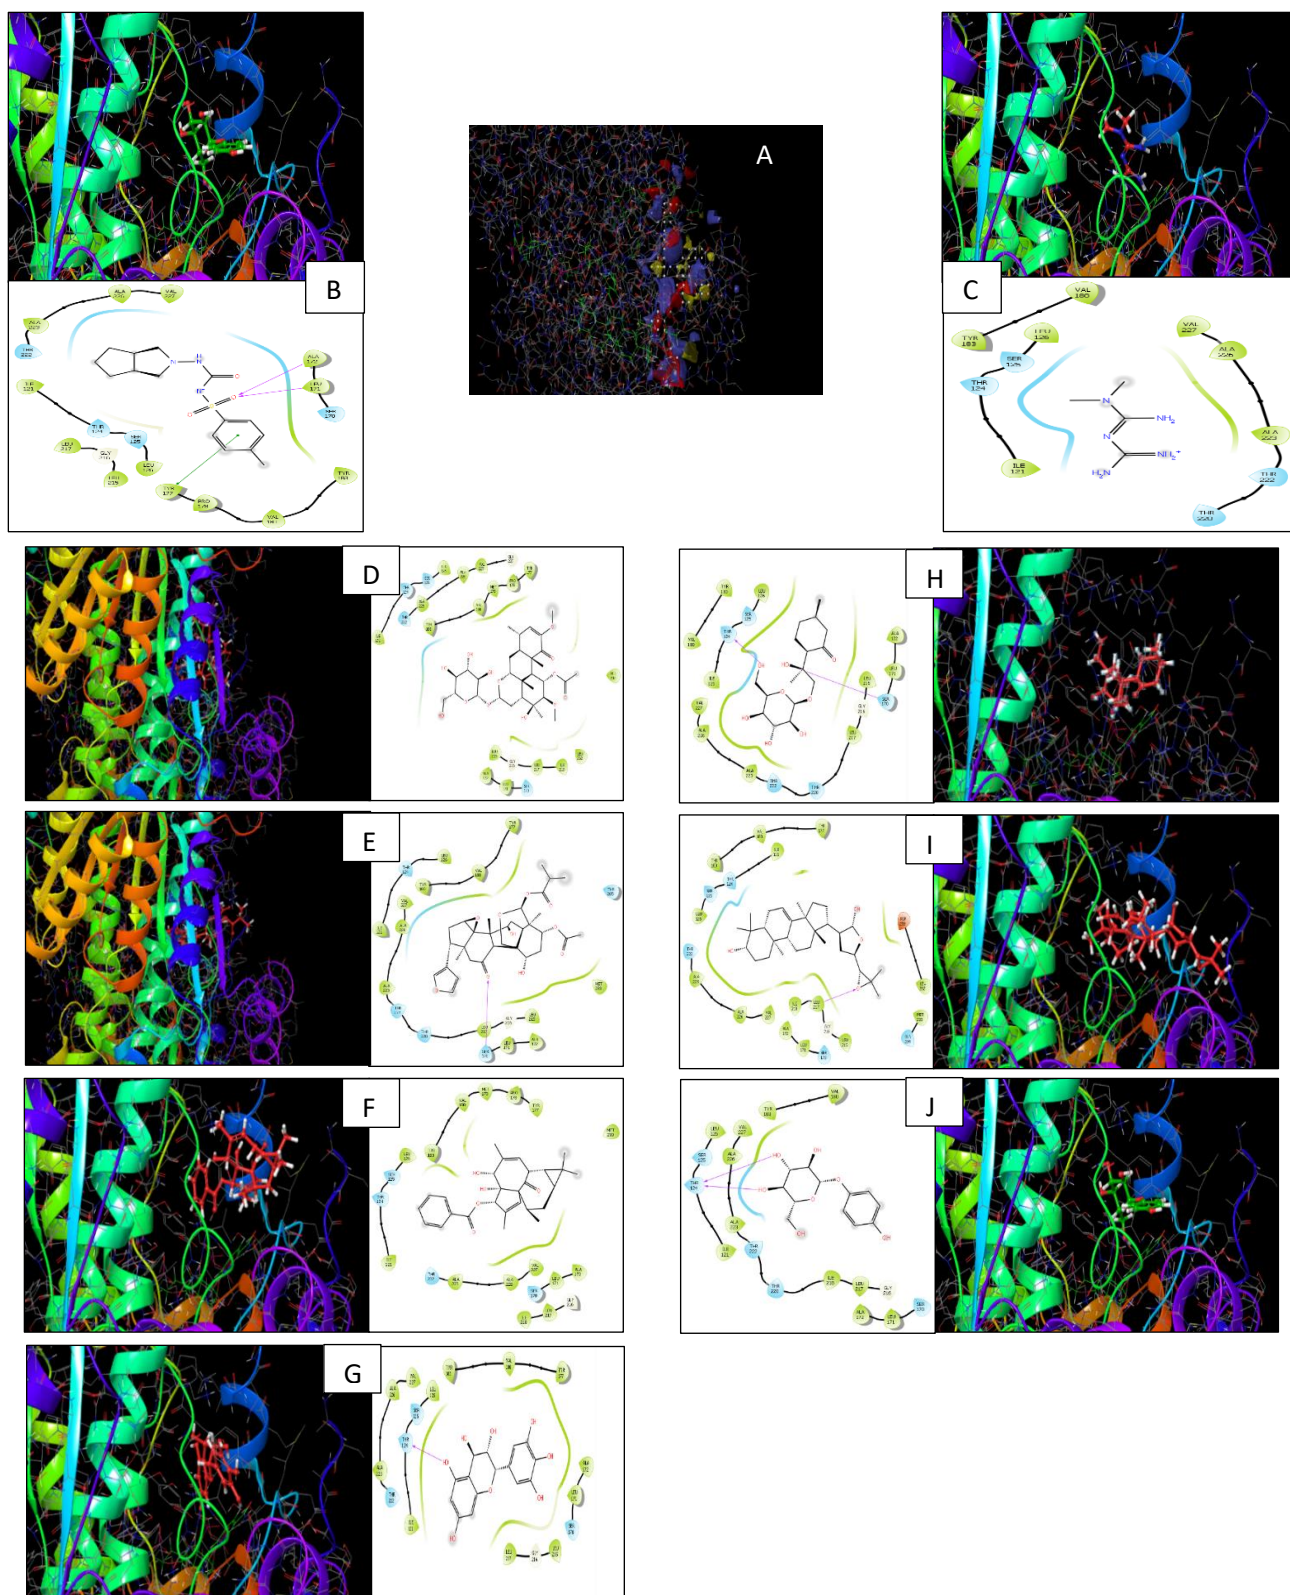

**Figure S5:** Interactions based on A. site map of seven ligands B. Gliclazide; C. Metformin; D. Picrasone; E. Azedarachin; F. 3-O-Benzoyl-20-deoxyingenol; G. Leucodelphinidin; H. Schizonepetoside; I. Melianol; and J. Arbutin with the receptor 2BEL. Melianol showed the highest docking score (-8.995) compared with the reference antidiabetic drugs B. Gliclazide and C. Metformin. The 3D protein binding has been presented with respective amino acid grooves for ligand interaction.

|                                                                                                                                                       |                                                                                                                                                                 |                                                                                                                                                   |                                                                                         |
|-------------------------------------------------------------------------------------------------------------------------------------------------------|-----------------------------------------------------------------------------------------------------------------------------------------------------------------|---------------------------------------------------------------------------------------------------------------------------------------------------|-----------------------------------------------------------------------------------------|
| <ul style="list-style-type: none"> <li>Charged (negative)</li> <li>Charged (positive)</li> <li>Glycine</li> <li>Hydrophobic</li> <li>Metal</li> </ul> | <ul style="list-style-type: none"> <li>Polar</li> <li>Unspecified residue</li> <li>Water</li> <li>Hydration site</li> <li>Hydration site (displaced)</li> </ul> | <ul style="list-style-type: none"> <li>Distance</li> <li>H-bond</li> <li>Metal coordination</li> <li>Pi-Pi stacking</li> <li>Pi-cation</li> </ul> | <ul style="list-style-type: none"> <li>Salt bridge</li> <li>Solvent exposure</li> </ul> |
|-------------------------------------------------------------------------------------------------------------------------------------------------------|-----------------------------------------------------------------------------------------------------------------------------------------------------------------|---------------------------------------------------------------------------------------------------------------------------------------------------|-----------------------------------------------------------------------------------------|



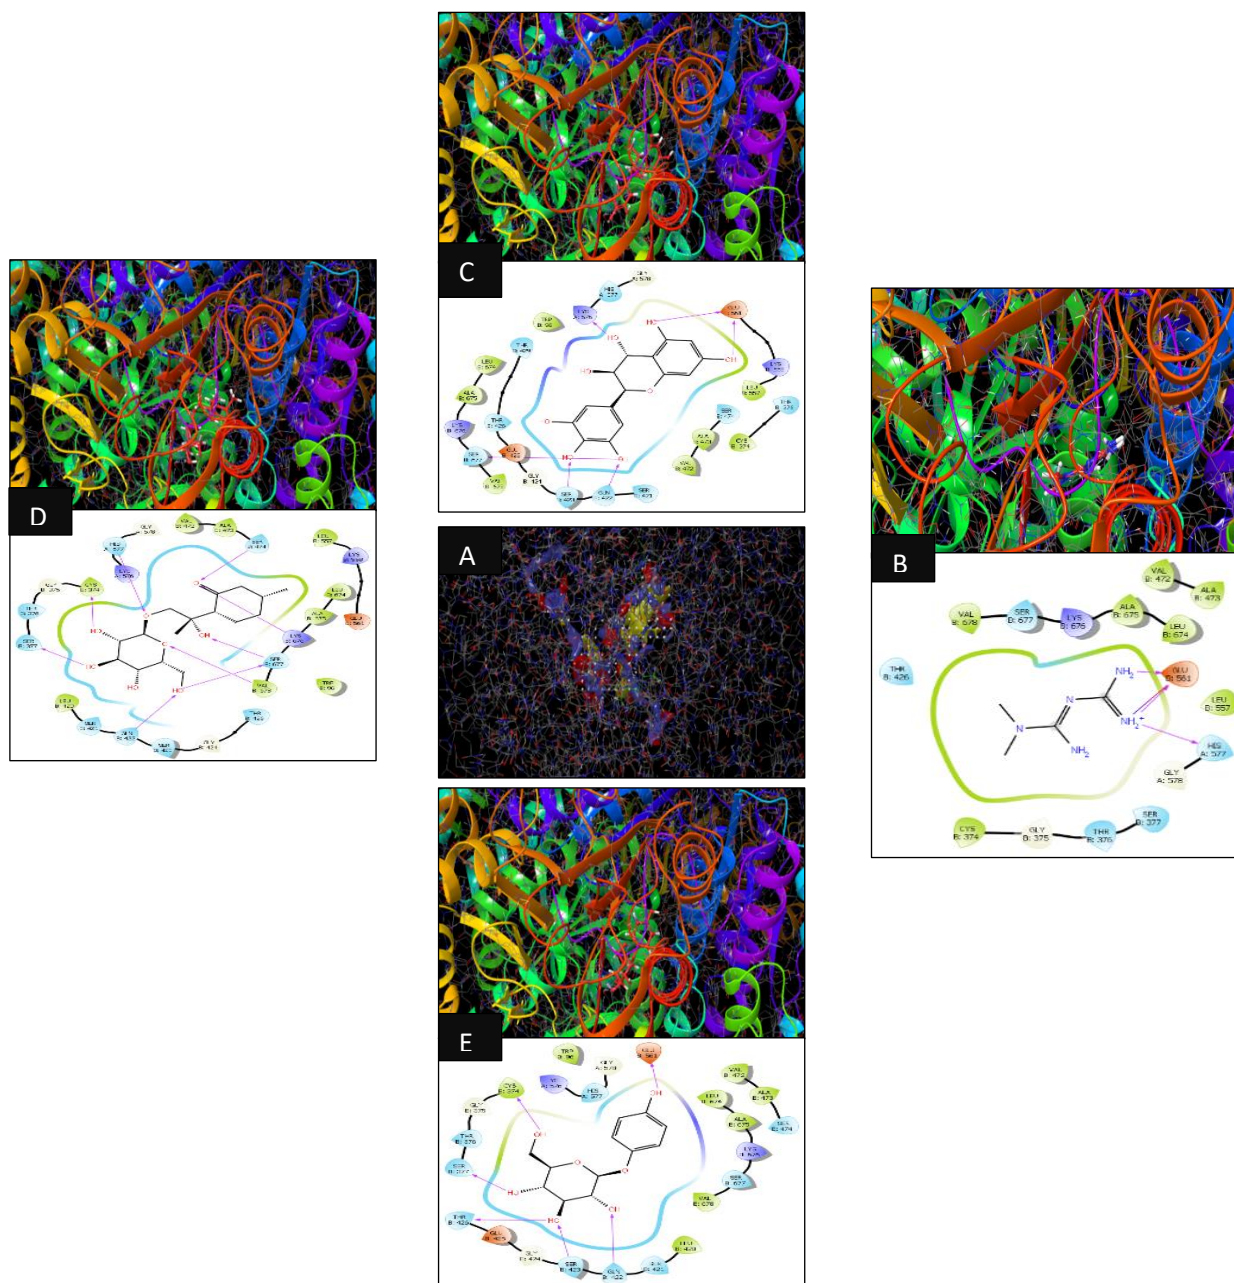

**Figure S6:** Interactions based on A. site map of three ligands C. Leucodelphinidin; D. Schizonepetoside E; and E. Arbutin with the receptor GR4F. Arbutin showed the highest docking score (-7.492) compared with the reference antidiabetic drug B. Metformin. The 3D protein binding has been presented with respective amino acid grooves for ligand interaction.

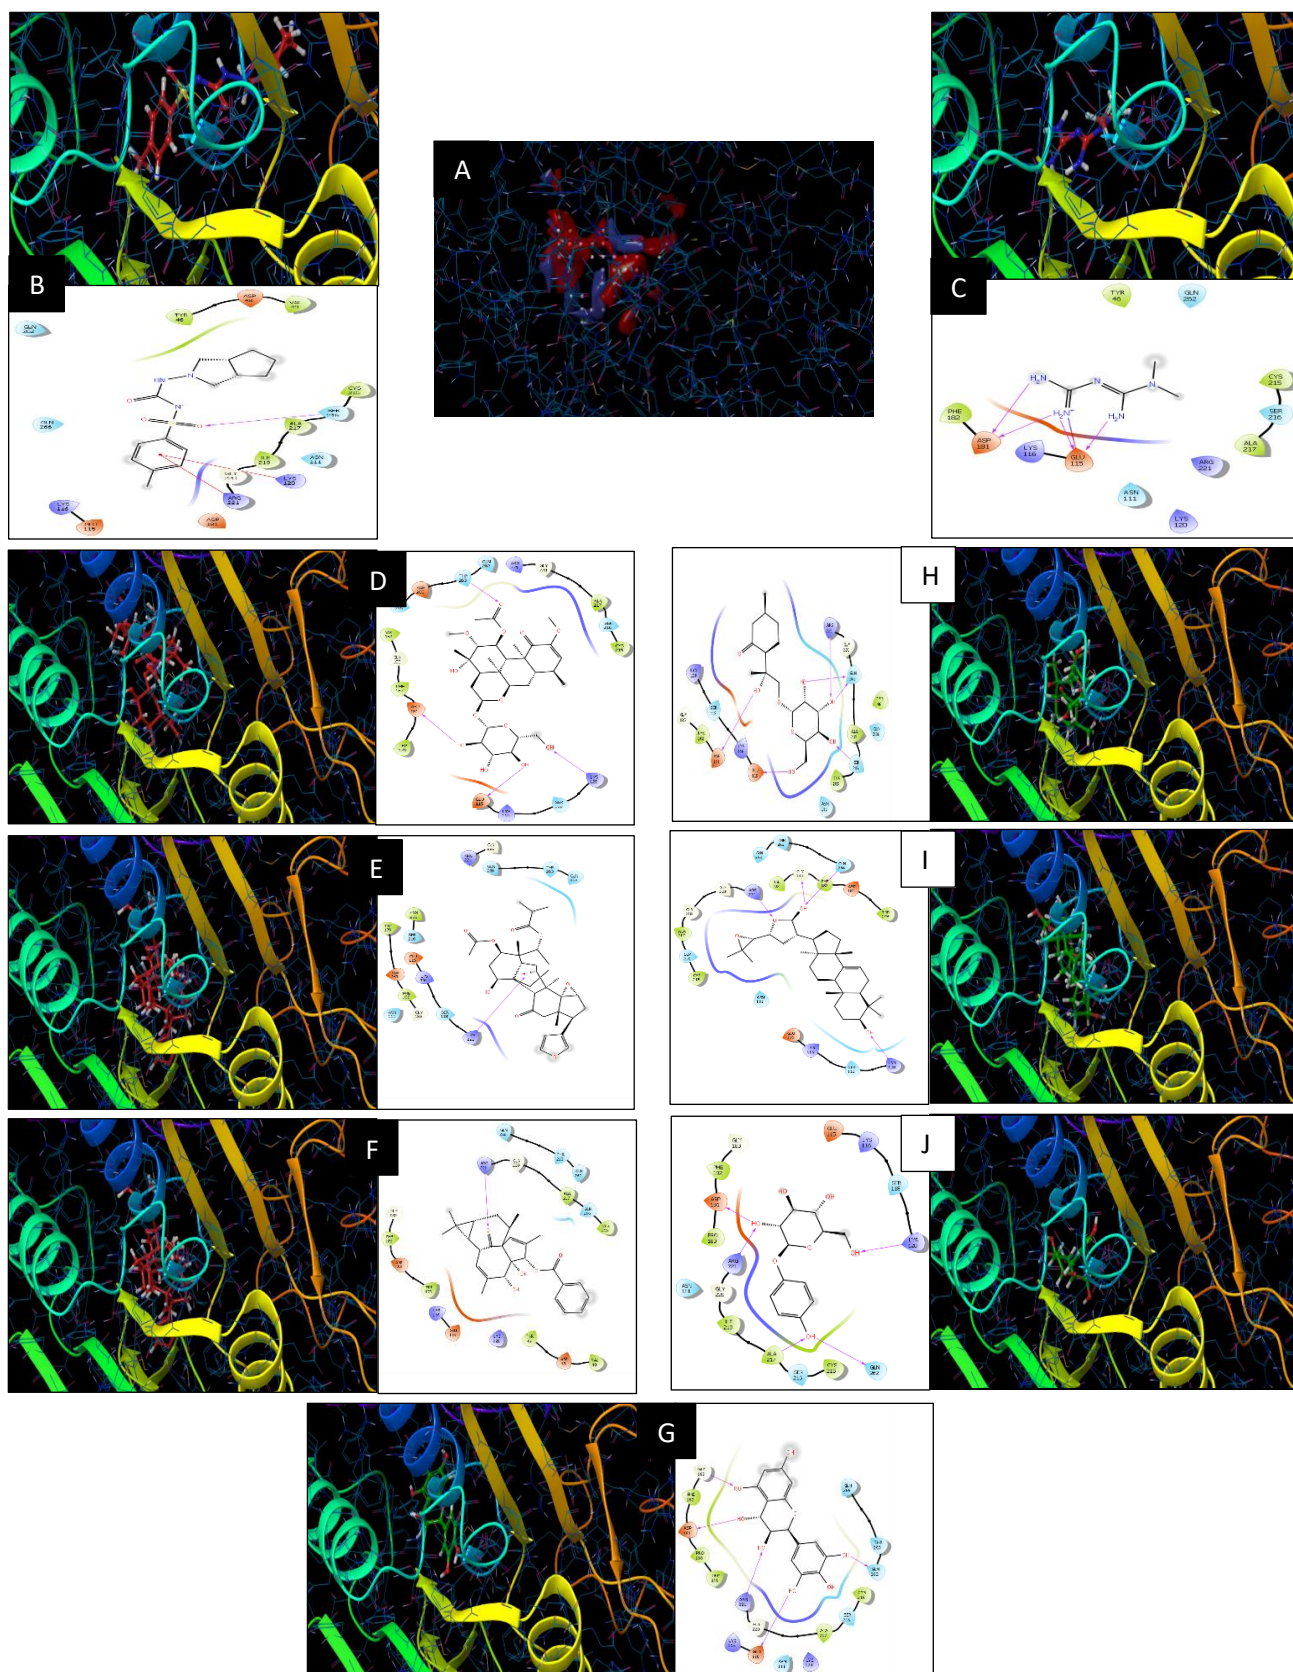

**Figure S7:** Interactions based on A. site map of seven ligands B. Gliclazide; C. Metformin; D. Picrasone E; E. Azedarachin C; F. 3-O-Benzoyl-20-deoxyingenol; G. Leucodelphinidin; H. Schizonepetoside E; I. Melianol; and J. Arbutin with the receptor 3A5J. 3-O-Benzoyl-20-deoxyingenol showed the highest docking score (-6.123) compared with the reference antidiabetic drugs B. Gliclazide and C. Metformin. The 3D protein binding has been presented with respective amino acid grooves for ligand interaction.



|                                                                                   |                    |                                                                                   |                            |                                                                                   |                    |                                                                                     |                  |
|-----------------------------------------------------------------------------------|--------------------|-----------------------------------------------------------------------------------|----------------------------|-----------------------------------------------------------------------------------|--------------------|-------------------------------------------------------------------------------------|------------------|
|  | Charged (negative) |  | Polar                      |  | Distance           |  | Salt bridge      |
|  | Charged (positive) |  | Unspecified residue        |  | H-bond             |  | Solvent exposure |
|  | Glycine            |  | Water                      |  | Metal coordination |                                                                                     |                  |
|  | Hydrophobic        |  | Hydration site (displaced) |  | Pi-Pi stacking     |                                                                                     |                  |
|  | Metal              |                                                                                   |                            |  | Pi-cation          |                                                                                     |                  |
